# Supplementary material
Source: publisher figshare collection journal article supplement (https://sage.figshare.com/ndownloader/files/18667235)
Supplement: Supplementary file 1 [file 18667235]

Supplementary 1. Detailed Results of Static Test

| Serial No | TBWKW | TBWRP | TBWCS |
| --- | --- | --- | --- |
| 1 | 520 N | 429 N | 983 N |
| 2 | 618 N | 349 N | 920 N |
| 3 | 620 N | 368 N | 1277 N |
| 4 | 312 N | 589 N | 625 N |
| 5 | 300 N | 444 N | 1294 N |
| 6 | 443 N | 340 N | 939 N |
| 7 | 460 N | 460 N | 1245 N |
| 8 | 245 N | 409 N | 1218 N |
| 9 | 552 N | 452 N | 1217 N |
| 10 | 316 N | 382 N | 1350 N |
| Mean ± SD | 438.6 ± 138.6 N | 422.2 ± 72.7 N | 1106.6 ± 230.3 N |

TBWKW: Tension band wiring using Kirschner wires; TBWRP: Tension band wiring using ring pins; TBWCS: Tension band wiring using cannulated screws; SD: Standard deviation

Supplementary 2. Detailed Results of Dynamic Test

| Serial No. | TBWKW | TBWRP | TBWCS |
| --- | --- | --- | --- |
| 1 | 0.8746 mm | 0.6158 mm | 0.0000 mm |
| 2 | 0.0000 460mm | 0.3230 mm | 0.0000 mm |
| 3 | 0.5204 mm | 0.1621 mm | 0.0000 mm |
| 4 | 0.1795 mm | 0.1567 mm | 0.1261 mm |
| 5 | 0.3854 mm | 0.0403 mm | 0.0000 mm |
| 6 | 0.0000 mm | 0.4652 mm | 0.0900 mm |
| Mean ± SD | 0.3267 ± 0.3395 mm | 0.2938 ± 0.2165 mm | 0.0360 ± 0.0570 mm |

TBWKW: Tension band wiring using Kirschner wires; TBWRP: Tension band wiring using ring pins; TBWCS: Tension band wiring using cannulated screws; SD: Standard deviation
